# Supplementary material
Source: HighWire-hosted journal article supplement (http://thorax.bmjjournals.com/highwire/filestream/174252/field_highwire_adjunct_files/1/online_supplement_figures.pdf)

1  
2  
3  
4  
5  
6  
7  
8  
9  
10  
11  
12  
13  
14  
15  
16  
17  
18  
19  
20  
21  
22  
23  
24  
25  
26  
27  
28  
29  
30  
31  
32  
33  
34  
35  
36  
37  
38  
39  
40  
41  
42  
43  
44  
45  
46  
47  
48  
49  
50  
51  
52  
53  
54  
55  
56  
57  
58  
59  
60

Figure E1 CONSORT diagram, severe asthma cohort

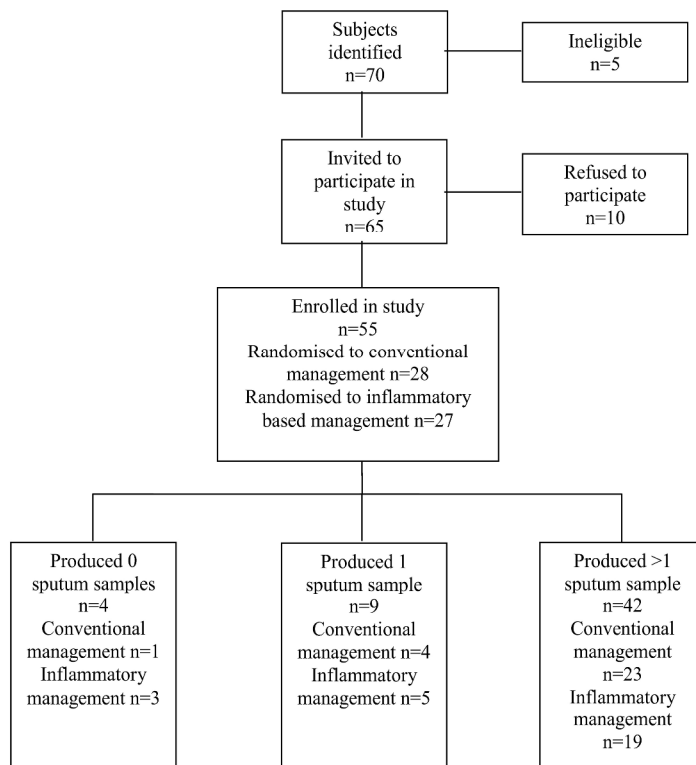

Figure E1 Consort diagram, severe asthma cohort  
297x420mm (300 x 300 DPI)

only

1  
2  
3  
4  
5  
6  
7  
8  
9  
10  
11  
12  
13  
14  
15  
16  
17  
18  
19  
20  
21  
22  
23  
24  
25  
26  
27  
28  
29  
30  
31  
32  
33  
34  
35  
36  
37  
38  
39  
40  
41  
42  
43  
44  
45  
46  
47  
48  
49  
50  
51  
52  
53  
54  
55  
56  
57  
58  
59  
60

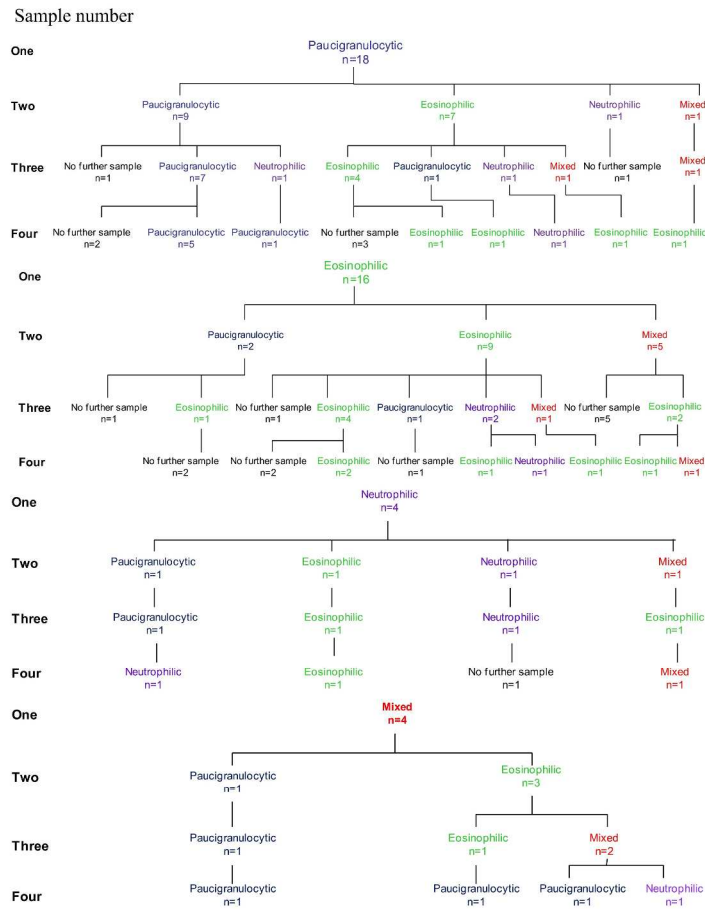

Figure E2 Starting inflammatory phenotype and subsequent phenotypes for subjects with severe asthma

Figure E2 Startin inflammatory phenotypes and sebsequent phenotypes for subjects with severe asthma  
297x420mm (300 x 300 DPI)

only

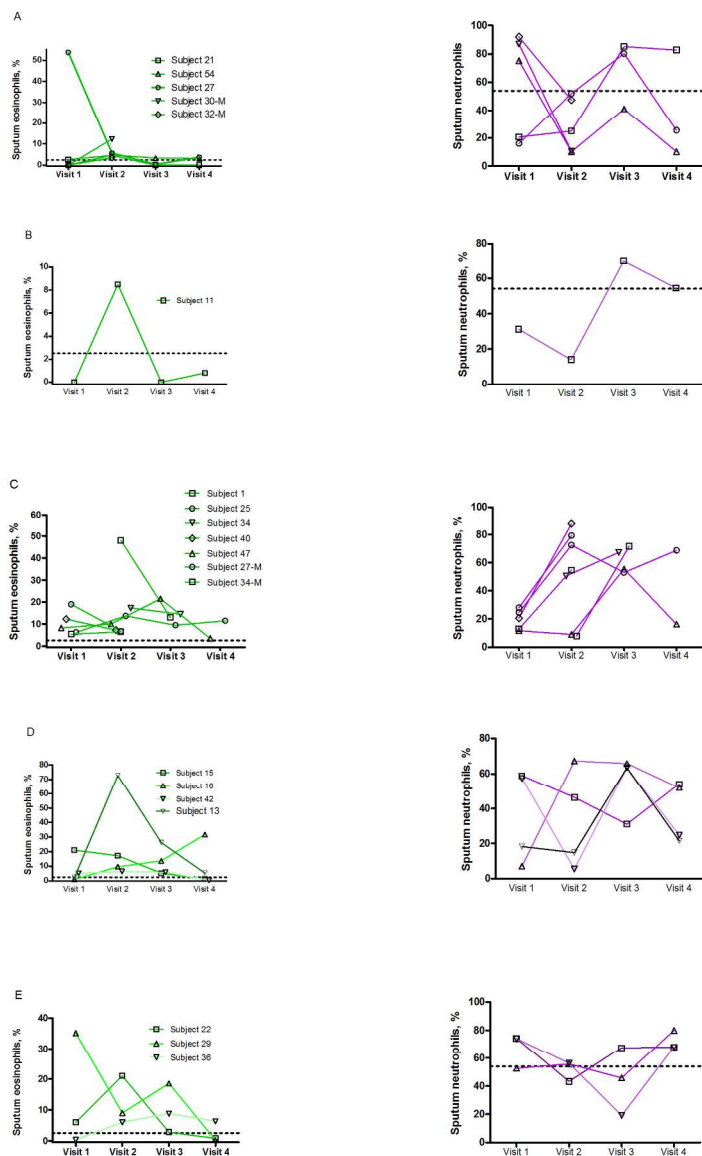

Figure E3 Changes in sputum eosinophils and neutrophils in subjects demonstrating 2 or more inflammatory phenotypes. A: eosinophilic and neutrophilic phenotypes; B: eosinophilic and neutrophilic and paucigranulocytic phenotypes; C: eosinophilic and mixed phenotypes; D: eosinophilic, mixed and paucigranulocytic phenotypes; E: eosinophilic, neutrophilic and mixed phenotypes. The left hand panel depicts changes in sputum eosinophils and the right hand panel changes in sputum neutrophils. Subjects with mild to moderate asthma are denoted by the suffix M  
 161x250mm (300 x 300 DPI)

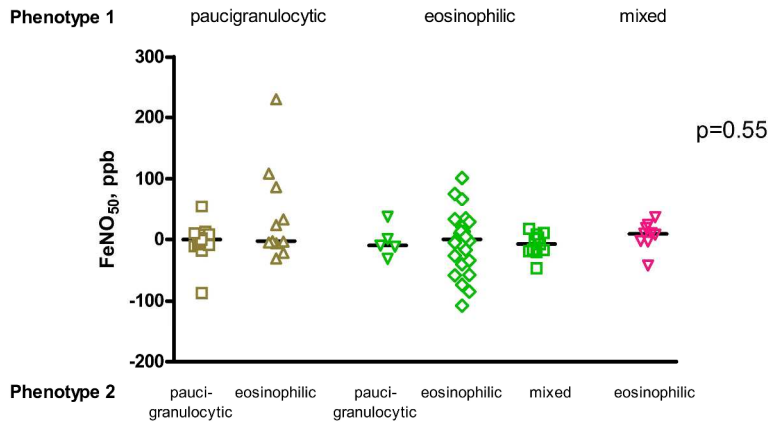

**Figure E4** Scatter plot showing the change in FeNO<sub>50</sub> for each phenotype change. The phenotype observed first is shown above the plots and the phenotype observed at the subsequent visit is shown below the x axis. The horizontal bar through each plot represents the group median. Comparison between the groups was made using the Kruskal Wallis test. There was no significant difference between the groups

Figure E4 Scatter plot showing the change in FeNO<sub>50</sub> for each phenotype change. The phenotype observed first is shown above the plots and the phenotype observed at the subsequent visit is shown below the x axis. The horizontal bar through each plot represents the group median. Comparison between the groups was made using the Kruskal Wallis test. There was no significant difference between the groups  
 287x418mm (300 x 300 DPI)

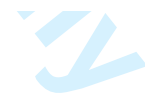

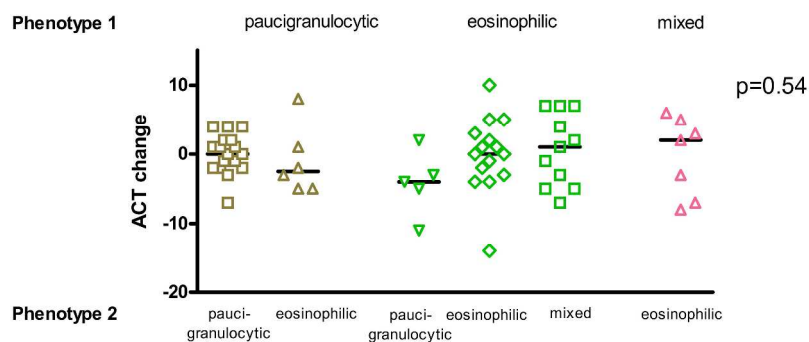

**Figure E5** Scatter plot showing the change in ACT score for each phenotype change. The phenotype observed first is shown above the plots and the phenotype observed at the subsequent visit is shown below the x axis. The horizontal bar through each plot represents the group median. Comparison between the groups was made using the ANOVA test. There was no significant difference between the groups

Figure E5 Scatter plot showing the change in ACT score for each phenotype change. The phenotype observed first is shown above the plots and the phenotype observed at the subsequent visit is shown below the x axis. The horizontal bar through each plot represents the group median. Comparison between the groups was made using the ANOVA test. There was no significant difference between the groups  
 287x418mm (300 x 300 DPI)

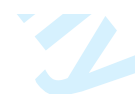

Supplement: online_supplement_figures.pdf [file online_supplement_figures.pdf]
